# Supplementary material for: UV-spectrum and photodecomposition of peroxynitrous acid in the troposphere
Source: Royal Society of Chemistry journal article supplement (doi:10.1039/d3cp04580c), 2023-11-27
Supplement: d3cp04580c1.pdf [file d3cp04580c1.pdf]

# UV-spectrum and photodecomposition of peroxynitrous acid in the troposphere: supplemental material

Wiem Chebbi, Najoua Derbel, Alexander Alijah, Thibaud Cours

November 13, 2023

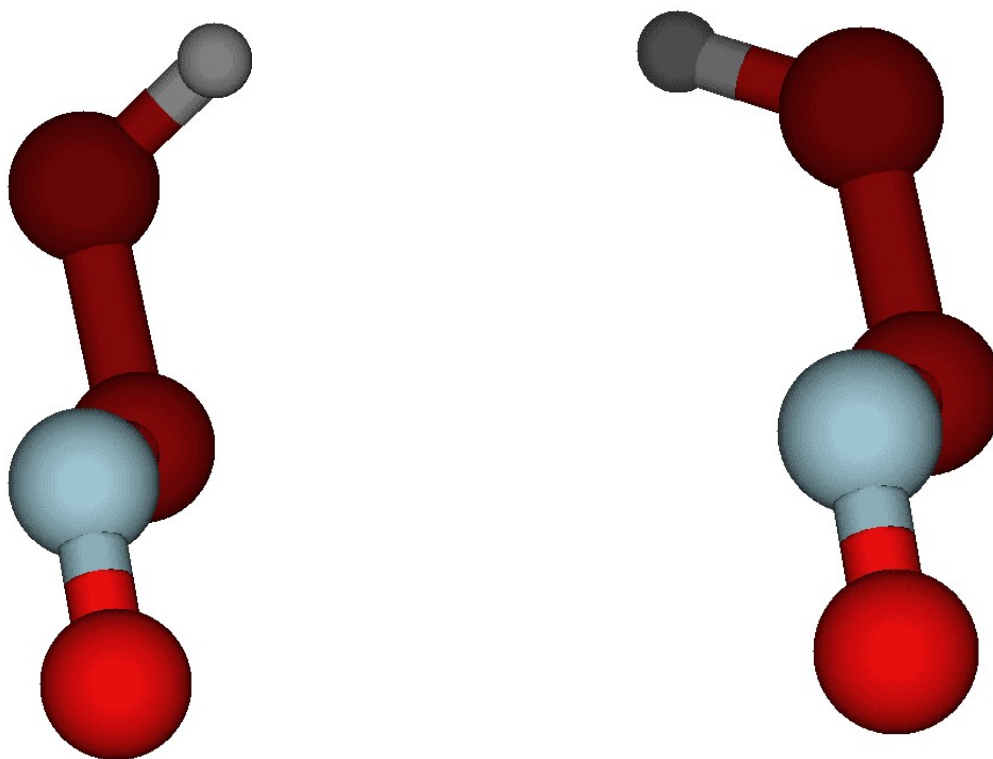

Figure 1: The two enantiomers of the trans-perp conformer

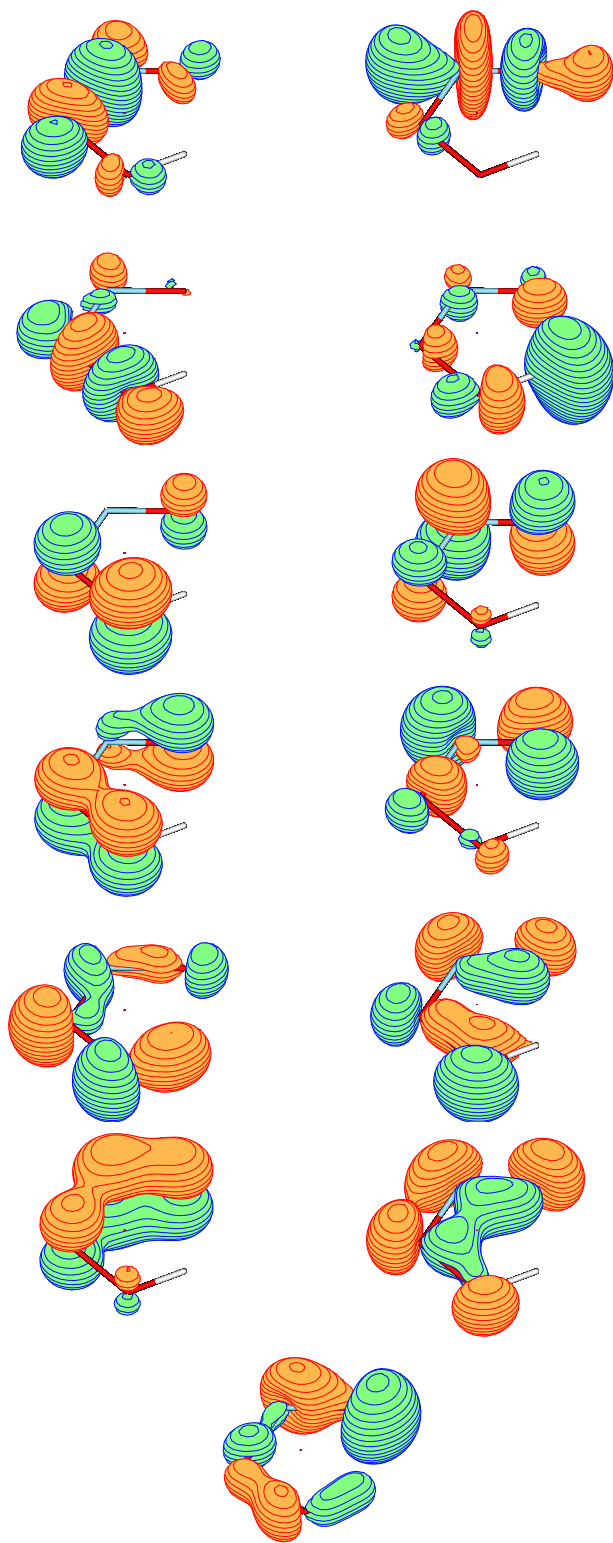

Figure 2: Active space (16e/13o) orbitals of the cis-cis conformer. Order from upper left to lower right is [20, 21], [18, 19], [16 (HOMO), 17 (LUMO)], [14, 15], [12, 13], [10, 11], [9]. The lowest eight molecular orbitals are linear combinations of the N, O 1s and 2s orbitals and were kept inactive.

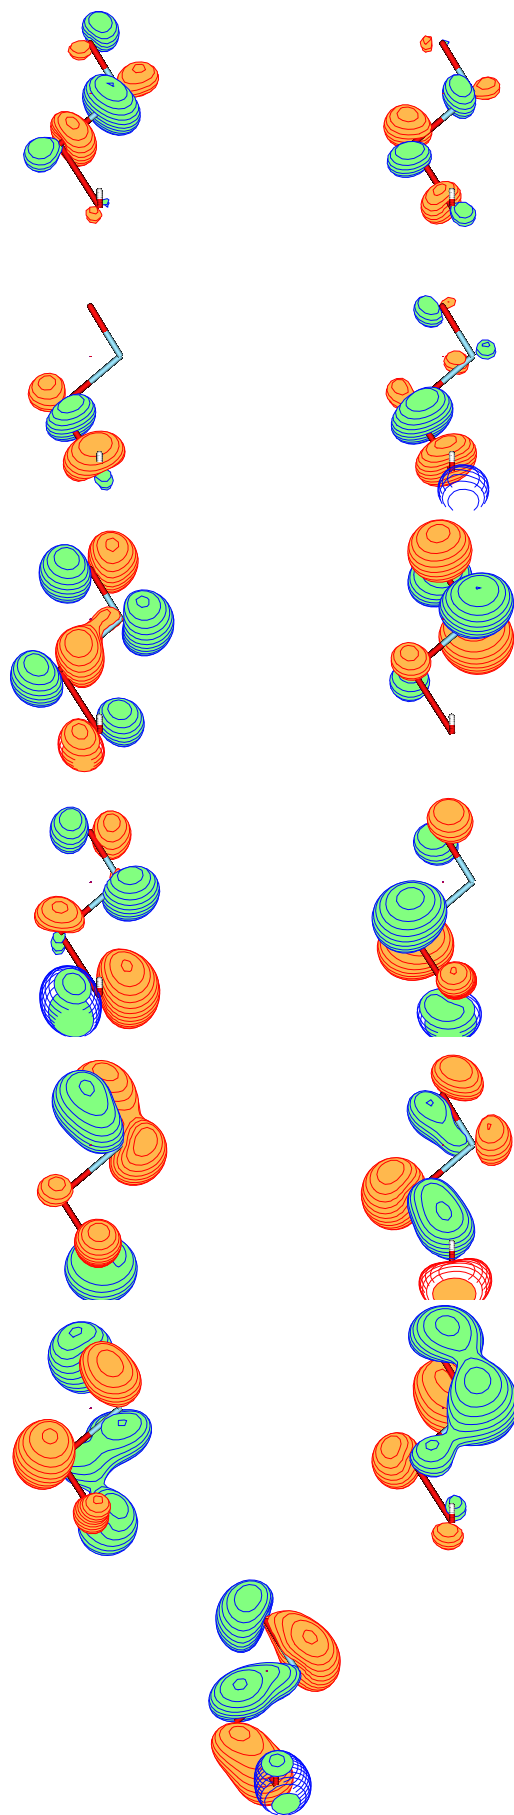

Figure 3: Active space (16e/13o) orbitals of the trans-perp conformer. Order from upper left to lower right is [20, 21], [18, 19], [16 (HOMO)], 17 (LUMO)], [14, 15], [12, 13], [10, 11], [9]. The lowest eight molecular orbitals are linear combinations of the N, O 1s and 2s orbitals and were kept inactive.
